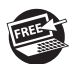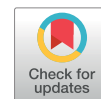

COMMENT ON LI ET AL.

## Visual Inspection of Chromatograms Assists Interpretation of HbA<sub>1c</sub>: A Case Report. *Diabetes Care* 2018;41:1829–1830

*Diabetes Care* 2019;42:e9 | <https://doi.org/10.2337/dc18-1836>

Jie Li,<sup>1</sup> Jie Lei,<sup>2</sup> An-ping Xu,<sup>1</sup> Yong Xia,<sup>1</sup> and Ling Ji<sup>1</sup>

We read with interest the article by Li et al. (1). The authors reported a case with an extremely abnormal HbA<sub>1c</sub> value due to interference of a hemoglobin (Hb) variant. We agree with the authors regarding the necessity of visual inspection of chromatograms of HbA<sub>1c</sub> prior to reporting the results, especially in the scenario of discordance between HbA<sub>1c</sub> and other clinical findings. However, we believe some comments and suggestions for future investigation are important for exploring this issue.

Li et al. (1) should double-check their gene sequencing data, which were not included in the case report. We note that they identified a heterozygous mutation (c.242T>A, Leu81His) in the *HBB* gene. However, according to the record of human hemoglobin variants in database HbVar (<http://globin.bx.psu.edu/hbvar/menu.html>) and the National Center for Biotechnology Information (NCBI), the nucleotide at position c.242 in the *HBB* gene is A instead of T. The mutation reported by Li et al. is more likely to have been c.245T>A in the *HBB* gene, which results in a transition of leucine to histidine. Besides, the clinical features of the reported case were similar to those in the proband with hemoglobin variant Hb La Roche-sur-Yon [β81(EF5)Leu→His, *HBB*: c.245T>A] (2).

Apart from cation-exchange high-performance liquid chromatography (HPLC)

used for the HbA<sub>1c</sub> measurement in the case report (1), other common methods based on different principles include capillary electrophoresis (CE), immunoassay, enzymatic assays, and boronate affinity HPLC (3). Based on our clinical practice and research, we want to emphasize the following points: 1) Recognition of the interference is crucial in order to prevent reporting erroneous results, especially in populations with a high prevalence of Hb variants such as in southern China. However, recognition of Hb variants depends on testing methods and the features of the Hb variants. For instance, we found that the common α- and β-globin variants in China, including Hb E, Hb New York, Hb J-Bangkok, Hb G-Coushatta, Hb Q-Thailand, Hb G-Honolulu, Hb Ube-2, and Hb G-Taipei, all can be separated by CE. Determination of HbA<sub>1c</sub> levels using CE showed less interference than cation-exchange HPLC instruments (4). The degree of impact on the measurement of HbA<sub>1c</sub> depends on the separation of Hb variants from Hb A (4,5). 2) For newly identified Hb variants, the degree of interference with HbA<sub>1c</sub> might be case dependent. Unlike the case reported by Li et al. (1) with a low level of HbA<sub>1c</sub> (initially measured at 2%), some Hb variants may present with a normal level of HbA<sub>1c</sub>. These Hb variants may be hard to discover if the analytical methods

have a limited capacity to prevent interference by Hb variants. For these patients, their geographic origins and the other indices of metabolic control should be carefully checked before any crucial treatment regimen is begun. 3) For those suspicious cases with Hb variants, repeat analysis of HbA<sub>1c</sub> should ideally be performed using a method based on a different analytical principle from the initial assay.

**Duality of Interest.** No potential conflicts of interest relevant to this article were reported.

### References

1. Li Q, Xiao Y, Shah AD, Li S. Visual inspection of chromatograms assists interpretation of HbA<sub>1c</sub>: a case report. *Diabetes Care* 2018;41:1829–1830
2. Wajcman H, Kister J, Vasseur C, et al. Structure of the EF corner favors deamidation of asparaginyl residues in hemoglobin: the example of Hb La Roche-sur-Yon [β81 (EF5) Leu→His]. *Biochim Biophys Acta* 1992;1138:127–132
3. Little RR, Rohlfing CL, Hanson S, et al. Effects of hemoglobin (Hb) E and HbD traits on measurements of glycated Hb (HbA<sub>1c</sub>) by 23 methods. *Clin Chem* 2008;54:1277–1282
4. Xu A, Chen W, Xia Y, Zhou Y, Ji L. Effects of common hemoglobin variants on HbA<sub>1c</sub> measurements in China: results for α- and β-globin variants measured by six methods. *Clin Chem Lab Med* 2018;56:1353–1361
5. Ji L, Yu J, Zhou Y, et al. Erroneous HbA<sub>1c</sub> measurements in the presence of β-thalassemia and common Chinese hemoglobin variants. *Clin Chem Lab Med* 2015;53:1451–1458

<sup>1</sup>Department of Laboratory Medicine, Peking University Shenzhen Hospital, Shenzhen, Guangdong, China

<sup>2</sup>Department of Laboratory Medicine, Maternity and Child Healthcare Hospital of Nanshan District, Shenzhen, Guangdong, China

Corresponding author: Ling Ji, 1120303921@qq.com

© 2018 by the American Diabetes Association. Readers may use this article as long as the work is properly cited, the use is educational and not for profit, and the work is not altered. More information is available at <http://www.diabetesjournals.org/content/license>.
